# Supplementary material
Source: publisher figshare collection journal article supplement (https://springernature.figshare.com/ndownloader/files/22955894)
Supplement: Supplementary file 1 [file 22955894]

**Additional file 4: Figure S3.**

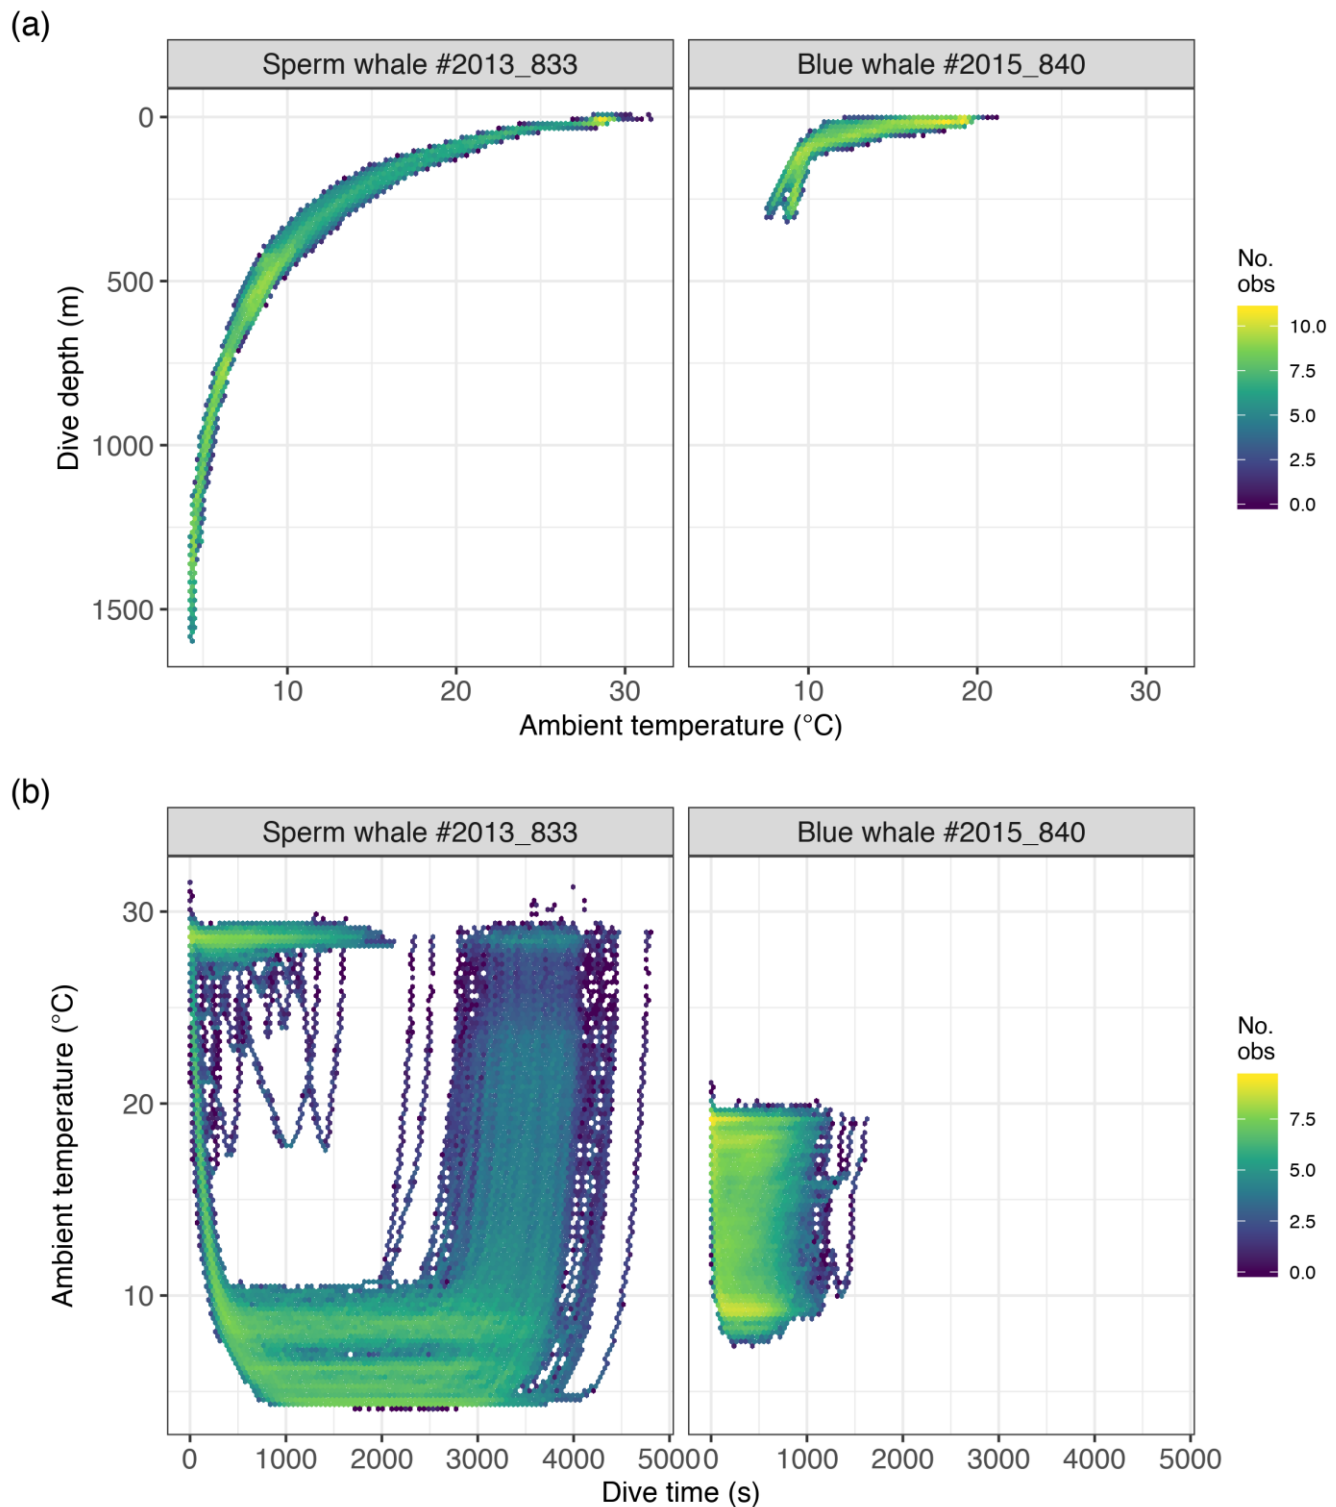

Plots for representative tagged whales showing (a) how ambient temperature varied as a function of depth during dives, and (b) how ambient temperature changed over time during dives (each dive is scaled to a common time unit, seconds). Data are presented for a sperm whale ( $n = 463$  dives; left panels) and a blue whale ( $n = 2,252$  dives; right panels) tracked with ADB tags in the Gulf of Mexico in 2013 and off southern California in 2015, respectively. Data are binned and shaded by the number of observations in each bin.
